# Supplementary material for: Chemically regulated bioactive ion delivery platform on a titanium surface for sustained controlled release
Source: Royal Society of Chemistry journal article supplement (doi:10.1039/c3tb21102a), 2013-10-29
Supplement: c3tb21102a.pdf [file c3tb21102a.pdf]

## Supplementary data

### Chemically regulated bioactive ions delivery platform on titanium surface for sustained controlled-release

Jinhua Li<sup>a</sup>, Wenjie Zhang<sup>b,c,1</sup>, Yuqin Qiao<sup>a,1</sup>, Hongqin Zhu<sup>a</sup>, Xinquan Jiang<sup>b,c\*</sup>,  
Xuanyong Liu<sup>a\*</sup> and Chuanxian Ding<sup>a</sup>

<sup>a</sup> State Key Laboratory of High Performance Ceramics and Superfine Microstructure,  
Shanghai Institute of Ceramics, Chinese Academy of Sciences, Shanghai 200050,  
China.

<sup>b</sup> Department of Prosthodontics, Ninth People's Hospital affiliated to Shanghai Jiao  
Tong University, School of Medicine, 639 Zhizaoju Road, Shanghai 200011, China.

<sup>c</sup> Oral Bioengineering Lab, Shanghai Research Institute of Stomatology, Ninth  
People's Hospital Affiliated to Shanghai Jiao Tong University, School of Medicine,  
Shanghai Key Laboratory of Stomatology, 639 Zhizaoju Road, Shanghai 200011,  
China.

#### Corresponding Authors:

Prof. Xuanyong Liu

State Key Laboratory of High Performance Ceramics and Superfine Microstructure, Shanghai  
Institute of Ceramics, Chinese Academy of Sciences, Shanghai 200050, China.

E-mail: [xyliu@mail.sic.ac.cn](mailto:xyliu@mail.sic.ac.cn)

Tel.: +86 21 52412409. Fax: +86 21 52412409.

Prof. Xinquan Jiang

Department of Prosthodontics, Ninth People's Hospital affiliated to Shanghai Jiao Tong University,  
School of Medicine, 639 Zhizaoju Road, Shanghai 200011, China.

E-mail: [xinquanj@yahoo.cn](mailto:xinquanj@yahoo.cn)

Tel.: +86 21 63135412. Fax: +86 21 63136856.

<sup>1</sup> These authors contributed equally to this work.

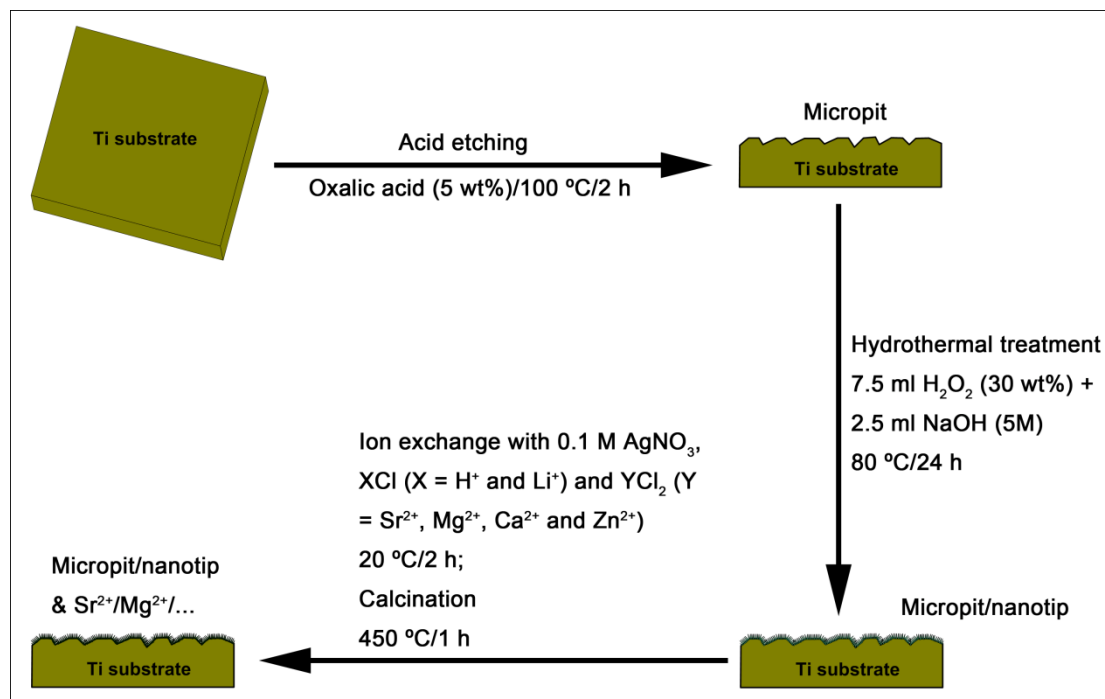

**Scheme S1.** Schematic fabrication procedure of bioactive ions-loaded and hierarchical hybrid micro/nanotip film on Ti substrate by combining acid etching, hydrothermal treatment and ion exchange process together.

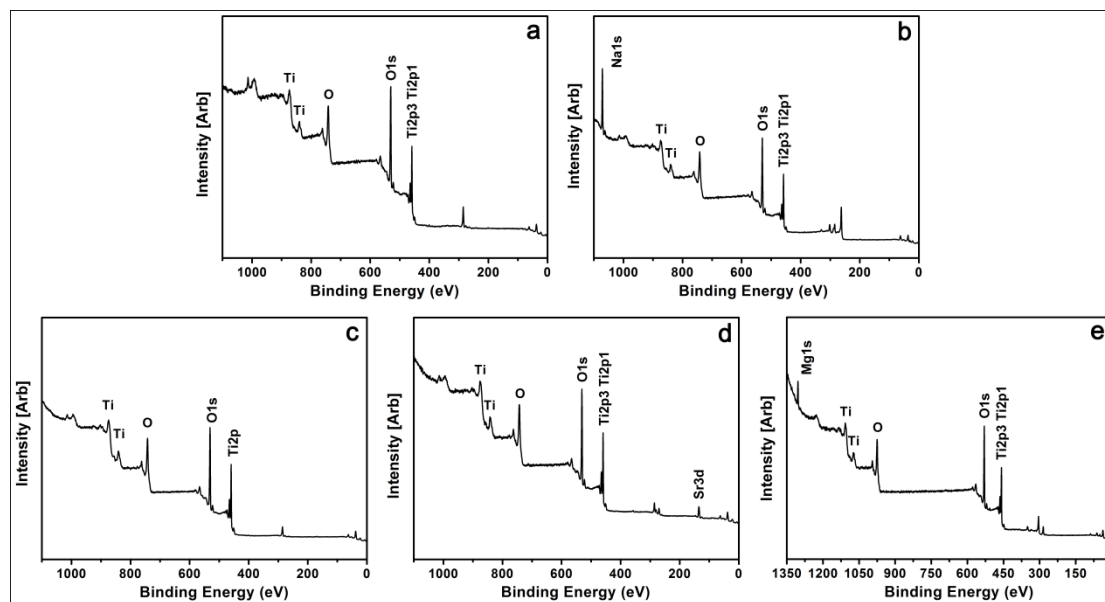

**Fig. S1.** XPS full spectra of Cp Ti (a), Na-NT (b), H-NT (c), Sr-NT (d) and Mg-NT (e) samples.

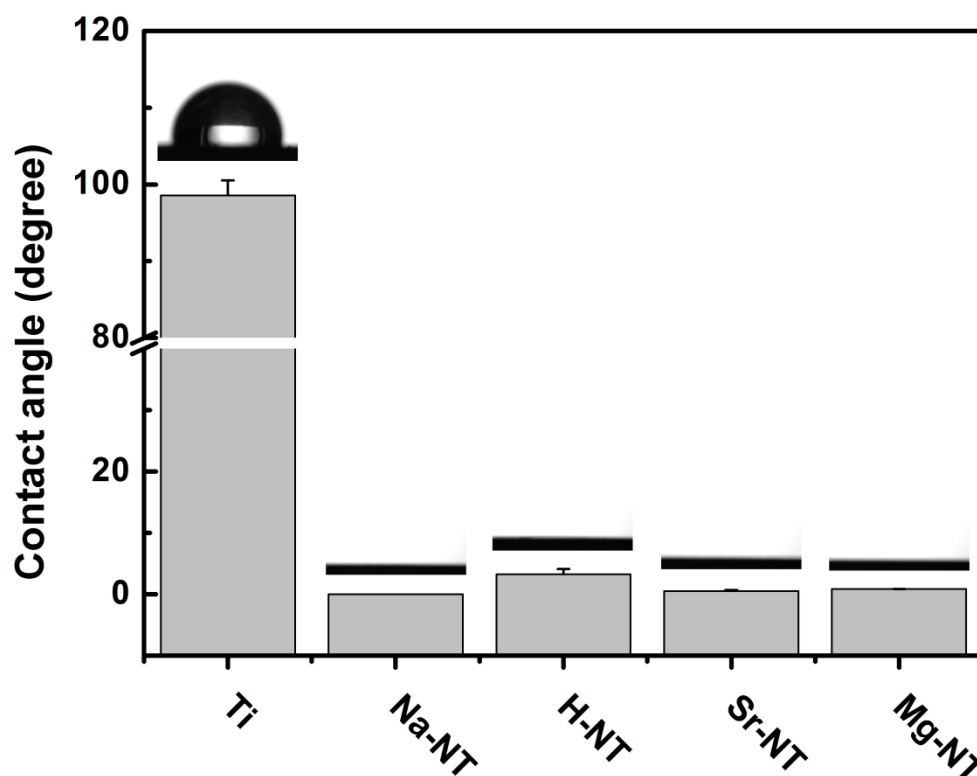

**Fig. S2.** Water contact angle measurements. The contact angles of Cp Ti, Na-NT, H-NT, Sr-NT and Mg-NT samples are displayed. The micro/nanostructured Na-NT, H-NT, Sr-NT and Mg-NT exhibited superhydrophilicity compared to Cp Ti. All the data are expressed as means  $\pm$  SD (standard deviation) and  $n = 5$ .

The surface wettability of Cp Ti, Na-NT, H-NT, Sr-NT and Mg-NT samples was measured by contact angle measurement (Automatic Contact Angle Meter Model SL200B, Solon information technology Co., Ltd, China). After 2  $\mu$ l sessile distilled water droplet was dropped onto sample surface, the cover of contact angle meter was shut down to ensure a dark space. Once the water droplet calmed down, the equipped camera system would capture the photograph immediately. The room temperature was 20  $^{\circ}$ C with atmospheric relative humidity of 30 %. Contact angles of five droplets were analyzed on each sample and the experiment was repeated twice. Results are expressed as means  $\pm$  SD.

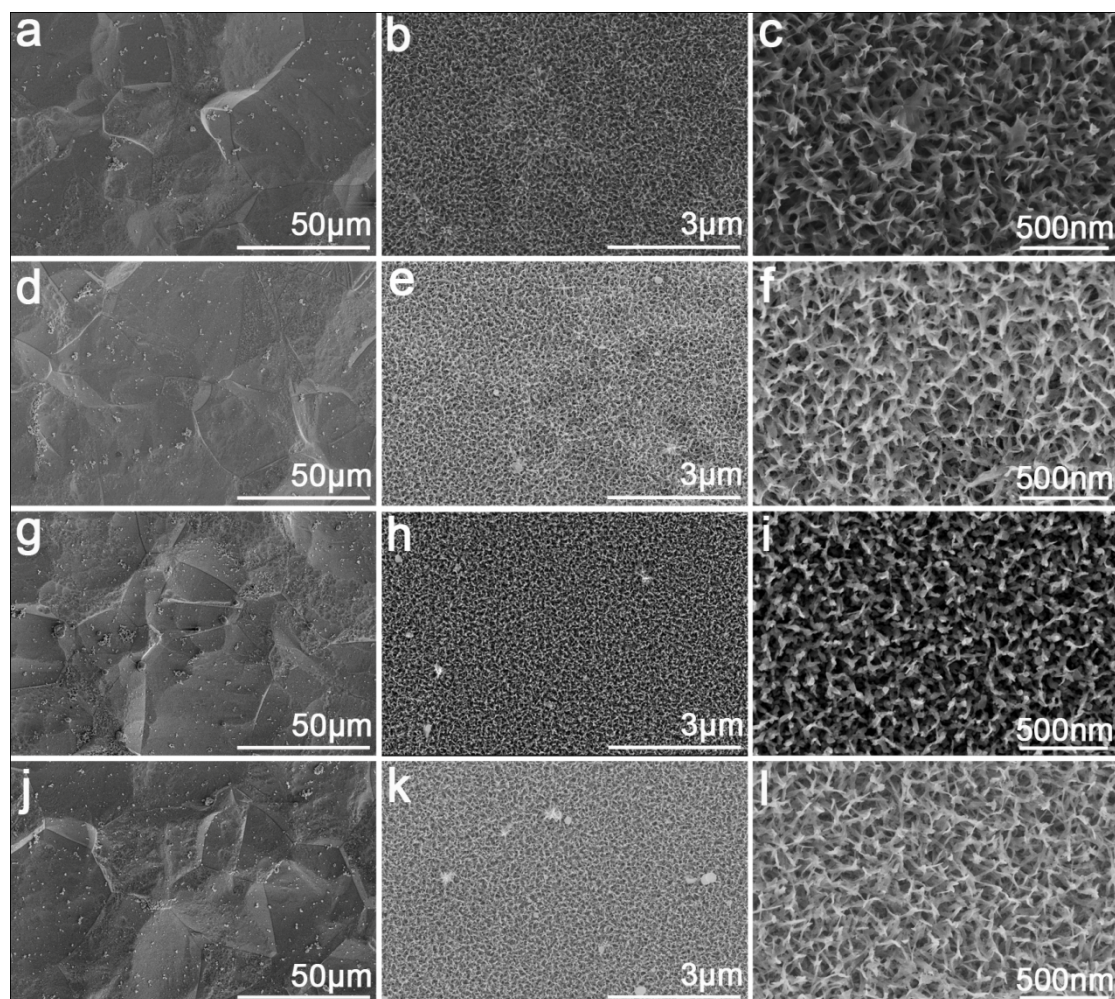

**Fig. S3.** SEM views of the as-prepared Ca-NT (a, b, c), Zn-NT (d, e, f), Ag-NT (g, h, i) and Li-NT (j, k, l) samples.

Figure S3 shows the surface topographies of Ti plates after undergoing acid etching, hydrothermal treatment and subsequent ion exchange with  $\text{Ca}^{2+}$ ,  $\text{Zn}^{2+}$ ,  $\text{Ag}^+$  and  $\text{Li}^+$ , followed by calcination, which can be seen that the nanotip topography was maintained and showed no significant difference from that on Na-NT surface at both low and high magnifications (Figs. 1g-i).

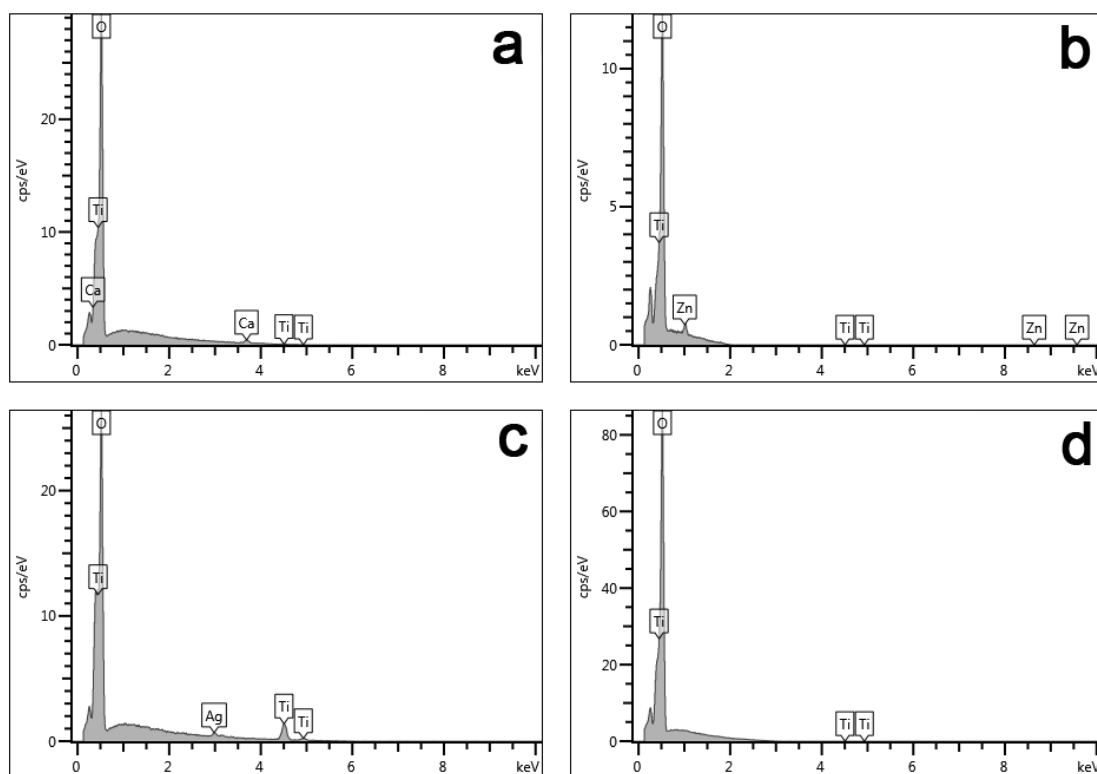

**Fig. S4.** EDS spectra obtained from Ca-NT (a), Zn-NT (b), Ag-NT (c) and Li-NT (d) samples. Note that the Li element cannot be detected by EDS.

As shown in Fig. S4,  $\text{Na}^+$  ions in the titanate layer on Ti surface were completely replaced by  $\text{Ca}^{2+}$ ,  $\text{Zn}^{2+}$ ,  $\text{Ag}^+$ ,  $\text{Li}^+$  respectively. In other words,  $\text{Na}^+$  ions in the titanate layer can be thoroughly eliminated via this facile ion exchange strategy with desired ions, which simultaneously maintained the surface nanotip topography on titanium substrate. (Ionic radii:  $\text{Ca}^{2+}$  0.1 nm;  $\text{Zn}^{2+}$  0.074 nm;  $\text{Ag}^+$  0.115 nm;  $\text{Li}^+$  0.076 nm.<sup>1</sup>)

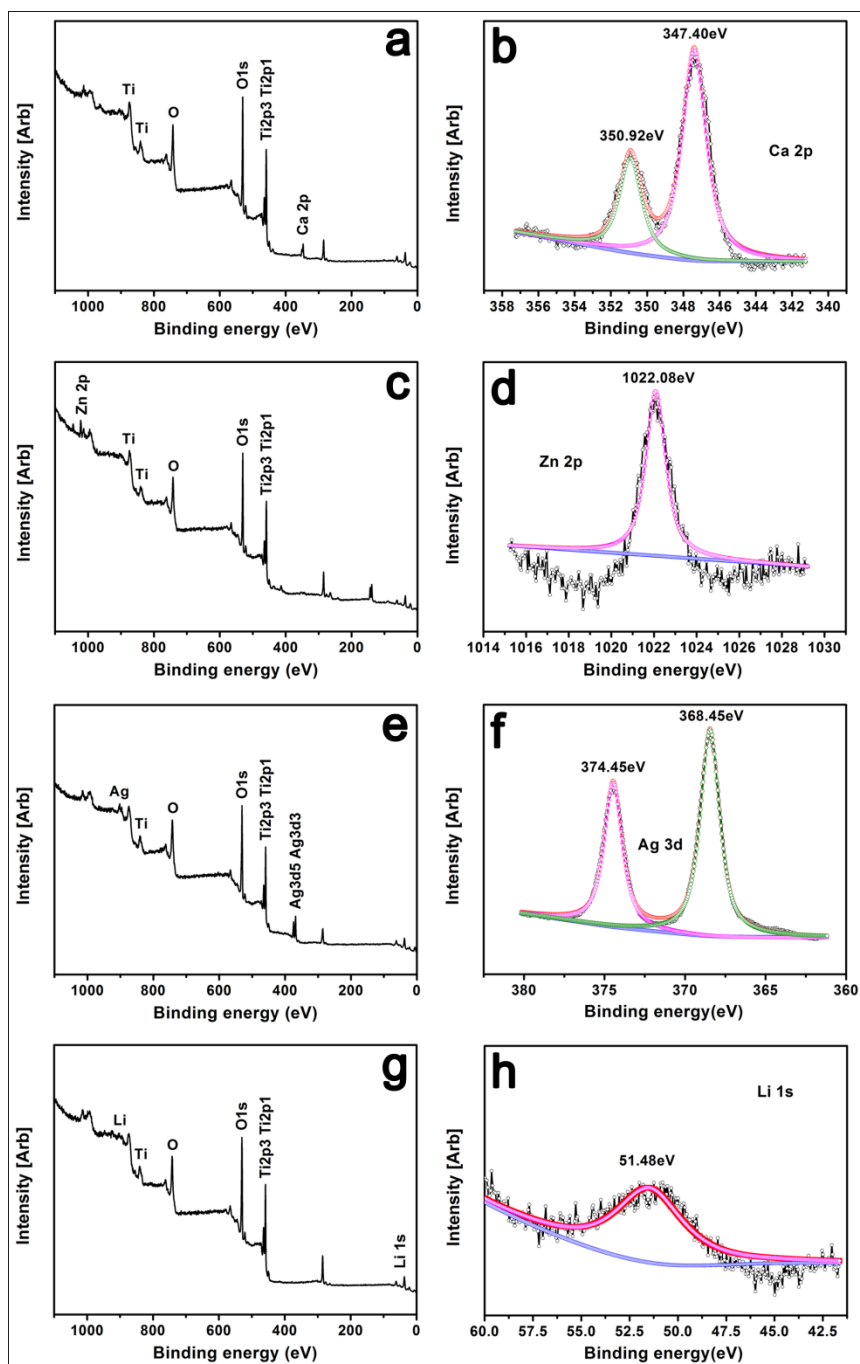

**Fig. S5.** XPS full spectra of Ca-NT (a), Zn-NT (c), Ag-NT (e) and Li-NT (g) samples, accompanied by the corresponding high-resolution XPS spectra of Ca 2p (b), Zn 2p (d), Ag 3d (f) and Li 1s (h).

Compared with the XPS full spectrum of Na-NT sample in Fig. S1(b), after ion exchange with  $\text{Ca}^{2+}$ ,  $\text{Zn}^{2+}$ ,  $\text{Ag}^+$ ,  $\text{Li}^+$  respectively, Na 1s peak disappeared and Ca 2p, Zn 2p, Ag 3d, Li 1s peaks were detected accordingly.



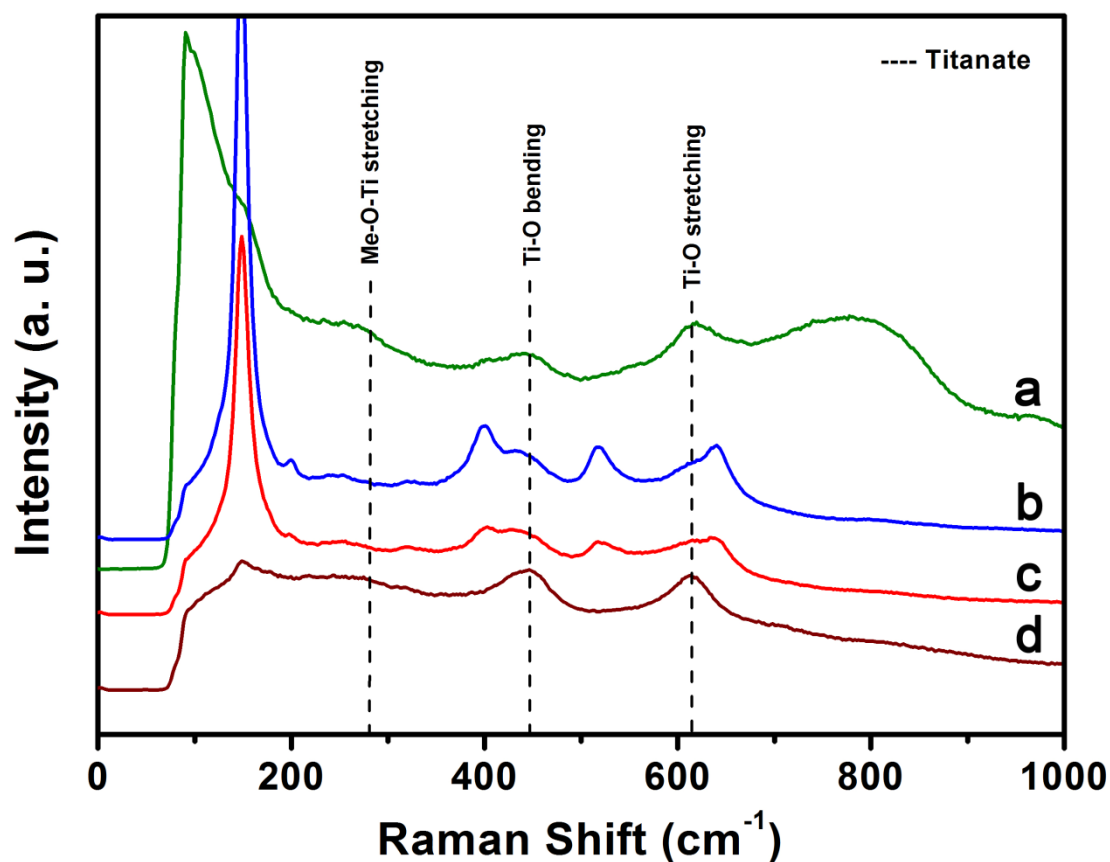

**Fig. S6.** Raman spectra acquired from Ag-NT (a), Li-NT (b), Zn-NT (c) and Ca-NT (d) samples respectively.

From Fig. S6, all of the bands were quite similar to the reported Raman data for titanates.<sup>2,3</sup> The band at 280 cm<sup>-1</sup> was ascribed to the Ag/Li/Zn/Ca–O–Ti stretching vibration; the peaks at around 450 and 600 cm<sup>-1</sup> were assigned to the Ti–O bending and stretching vibrations involving sixfold-coordinated titanium and threefold-coordinated oxygen.

## Notes and references

1. <http://abulafia.mt.ic.ac.uk/shannon/ptable.php>
2. Riss, A., et al., Chemical Control of Photoexcited States in Titanate



Nanostructures. *Nano Letters*, 2007. **7**(2): p. 433-438.

3. Ma, R., et al., Structural Features of Titanate Nanotubes/Nanobelts Revealed by Raman, X-ray Absorption Fine Structure and Electron Diffraction Characterizations. *The Journal of Physical Chemistry B*, 2005. **109**(13): p. 6210-6214.
